# Supplementary material for: Enhanced functional properties of biodegradable Polyvinyl alcohol /carboxymethyl cellulose (PVA/CMC) composite films reinforced with L-alanine surface modified CuO nanorods
Source: Research Square preprint supplement (doi:10.21203/rs.3.rs-918116/v1), 2021-09-29
Supplement: Supplementary file 1 [file f86179457cea5c500abe54ed.docx]

**Enhanced functional properties of biodegradable Polyvinyl alcohol /carboxymethyl cellulose (PVA/CMC) composite films reinforced with L-alanine surface modified CuO nanorods**

**Yamanappagouda Amaregouda1,****Kantharaju Kamanna1*, Tilak Gasti2 and Vijay Kumbar3**

*1School of Basic Sciences: Department of Chemistry, Rani Channamma University, Vidyasangama, P-B, NH-4, Belagavi -591156, Karnataka.*

*Tel: +91(0831)-2565203; Fax: +91-(0831)-2565240*

**Corresponding author:* E-mail: [kk@rcub.ac.in](mailto:kk@rcub.ac.in)

2Department of Chemistry, Karnatak University, Dharwad – 580003, India

3Maratha Mandal's Central Research Laboratory, Belgavi-590010


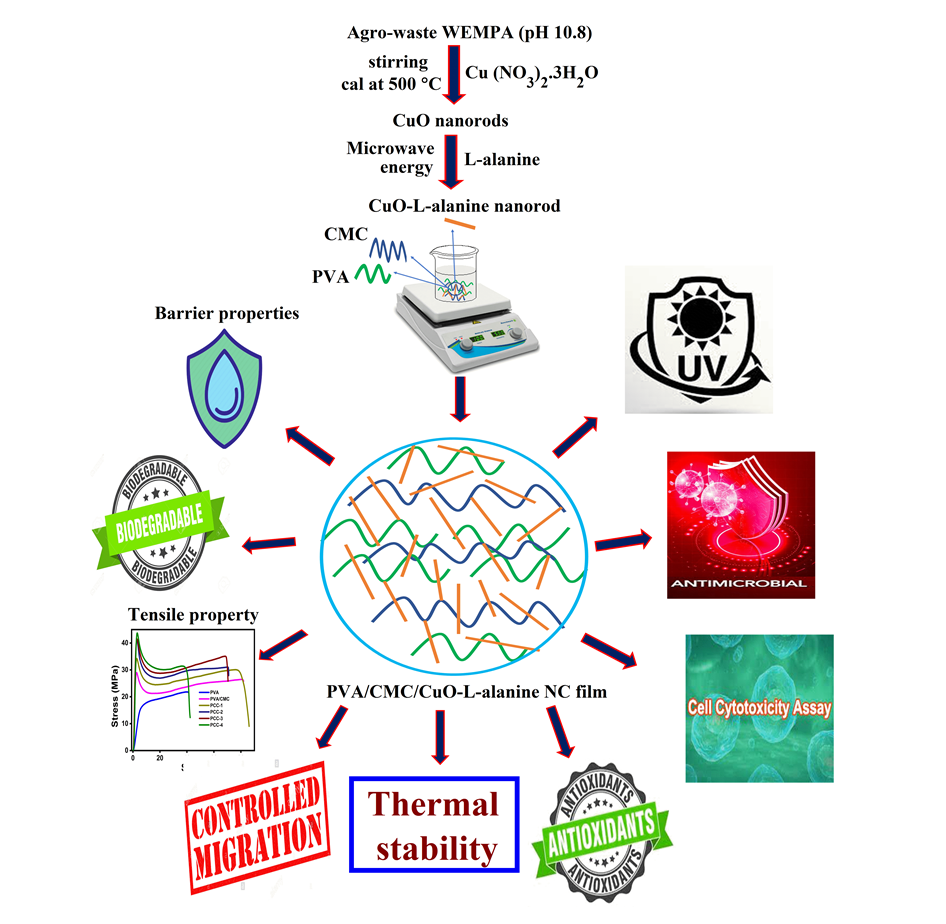


**Graphical abstract**
